# Supplementary material for: Platelet activation through CD62P and the formation of platelet–monocyte complexes are associated with the exacerbation of mucosal inflammation in patients with ulcerative colitis
Source: PubMed Central journal article supplement — Sci Rep. 2024 Nov 14;14:28055. doi: 10.1038/s41598-024-78462-8 (PMC11564891; doi:10.1038/s41598-024-78462-8), 2024-11-14
Supplement: 41598_2024_78462_MOESM1_ESM.pdf [file 41598_2024_78462_MOESM1_ESM.pdf]

MES0

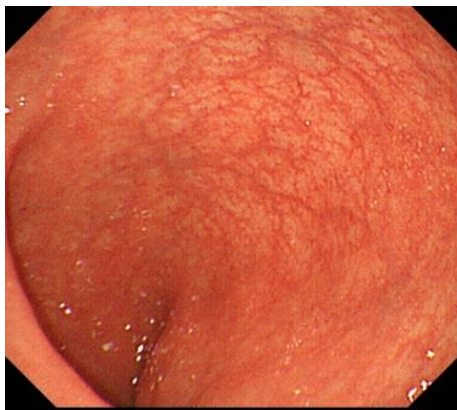

MES1

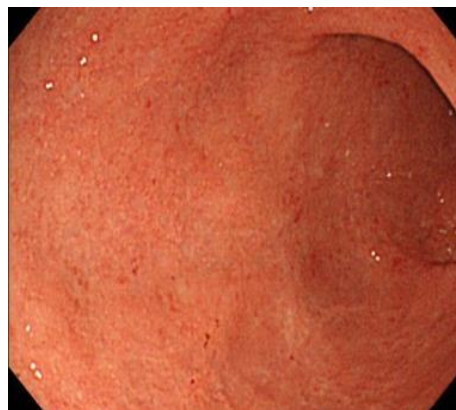

MES2

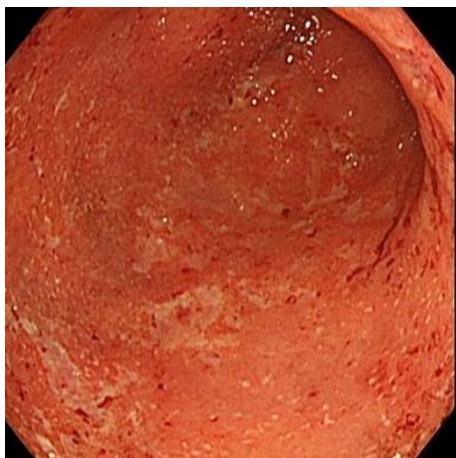

MES3

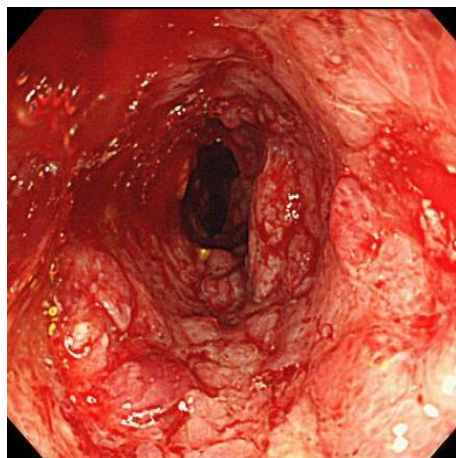

**Supplementary Fig. S1. Mayo endoscopic subscore**

Typical endoscopic findings in patients with Mayo endoscopic subscore (MES) of 0 (endoscopic remission), 1 (mild inflammation), 2 (moderate inflammation), and 3 (severe inflammation).

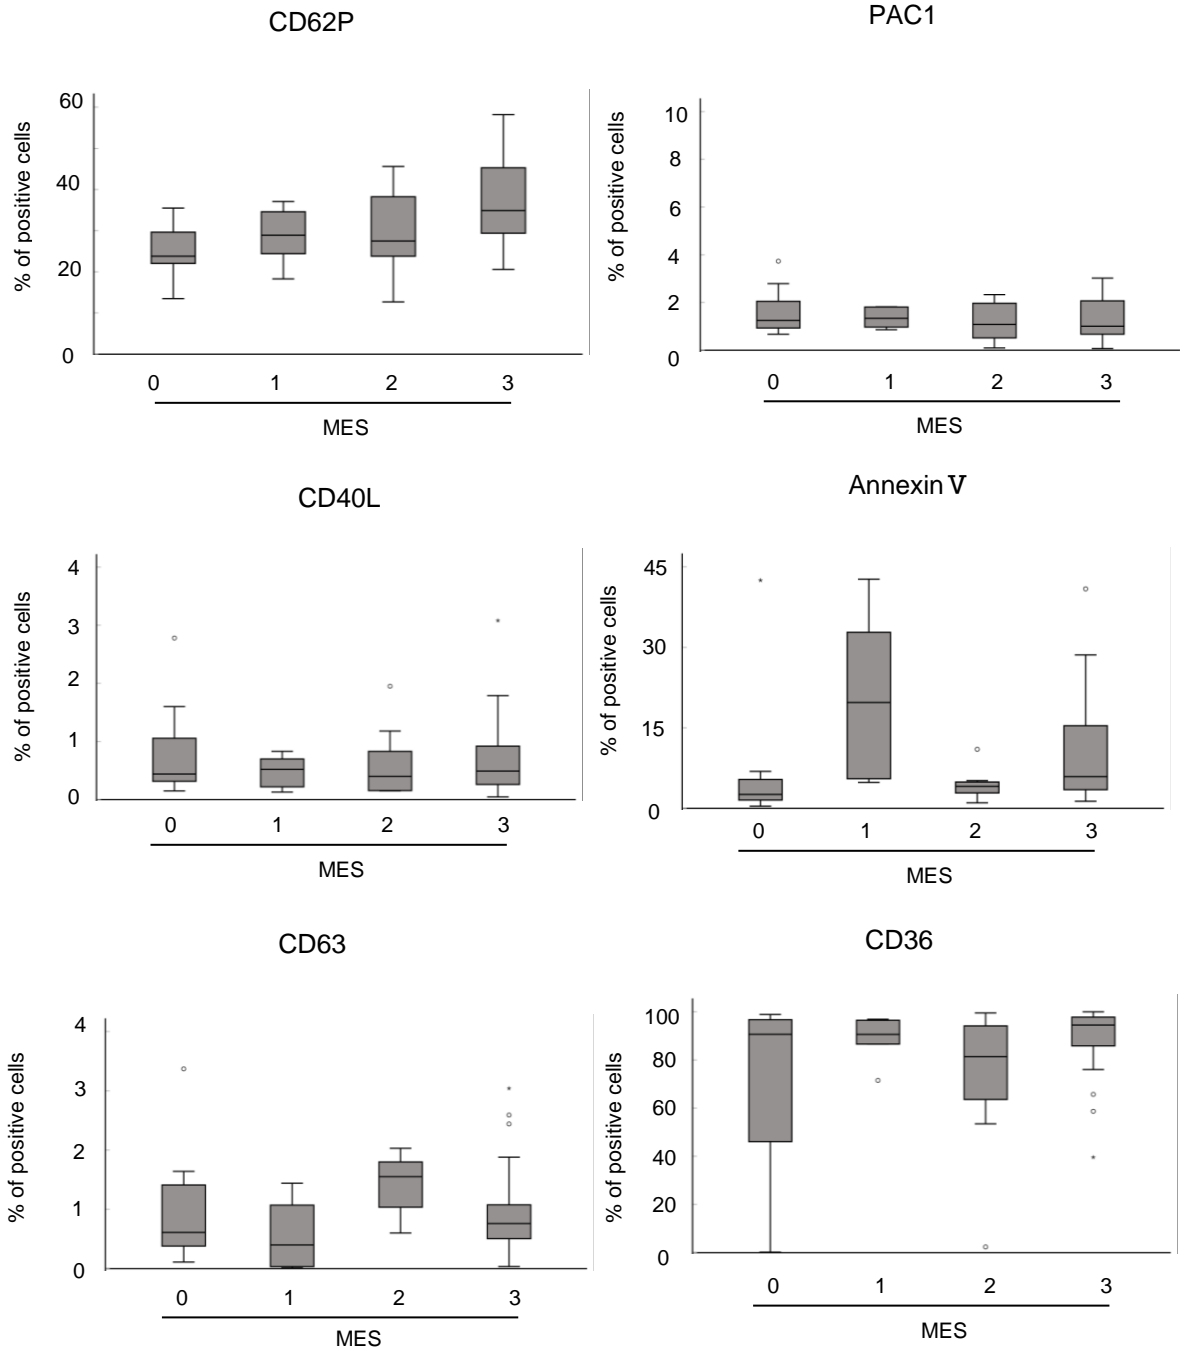

**Supplementary Fig. S2. The expression of platelets activation markers in each MES**  
The endoscopic findings represented by MES (n=52) were compared with the expression of CD62P, CD40L, CD63, PAC1, annexin V, and CD36 in platelets collected on the day of colonoscopy.

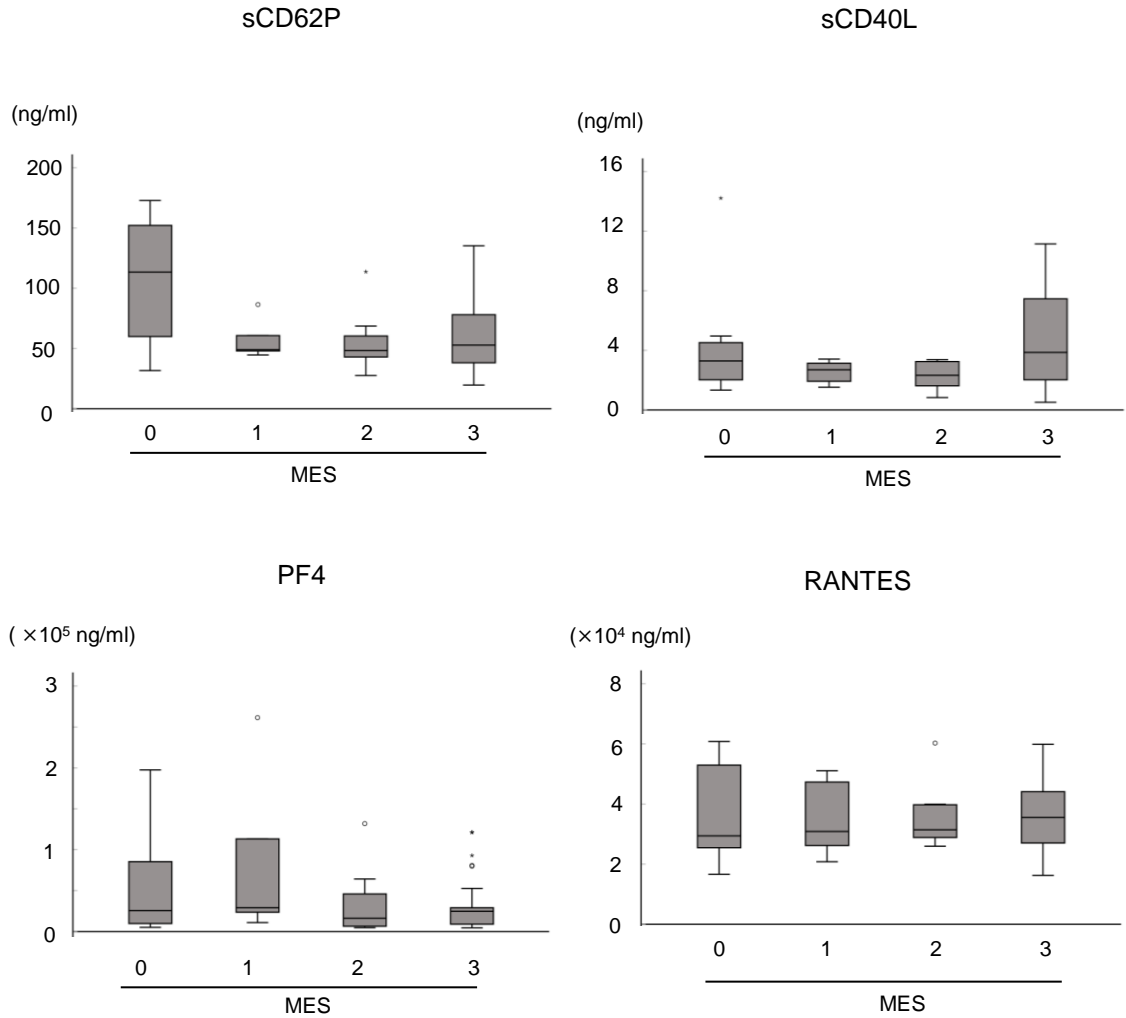

**Supplementary Fig. S3. The concentrations of platelet-derived soluble factors in each MES**

The endoscopic findings represented by MES (n=52) were compared with the concentrations of sCD62P, sCD40L, PF4, and RANTES in the sera collected on the day of colonoscopy.
